# Supplementary material
Source: PubMed Central journal article supplement (PMC5084884)
Supplement: ASN.2015080848SupplementaryData.pdf [file ASN.2015080848SupplementaryData.pdf]

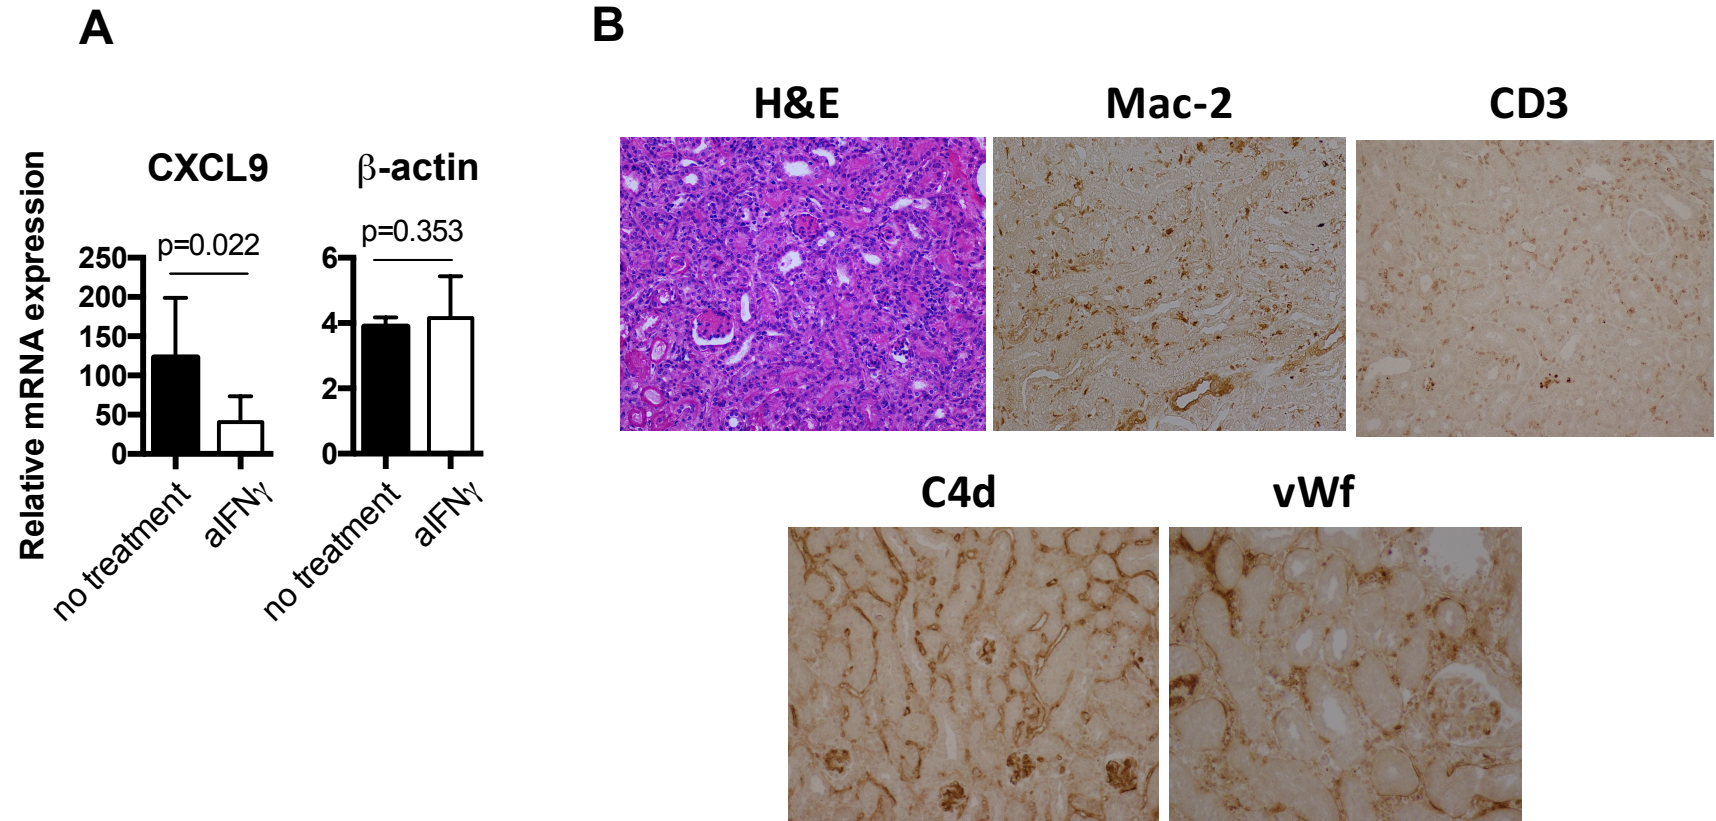

**Supplementary Figure 1. Acute allograft tissue injury in recipients containing donor-sensitized memory CD4 T cells and treated with anti-IFN $\gamma$  mAb.** B6 recipients injected with sensitized memory CD4 T cells were treated with either anti-IFN $\gamma$  neutralizing mAb GK1.5 (0.5 mg i.p. every other day starting at the time of transplantation). **A.** The expression of IFN $\gamma$ -dependent CXCL9 and control  $\beta$ -actin mRNA was evaluated in kidney allografts at the time of rejection by real-time RT-PCR. **B.** Renal allografts were harvested at the time of rejection and analyzed by H&E staining and immunoperoxidase stains for Mac-2, CD3, C4d and von Willebrand factor (vWf). Original magnification 400x for vWf staining and 200x for all other stainings. The photographs are representative of 6 recipients per group.

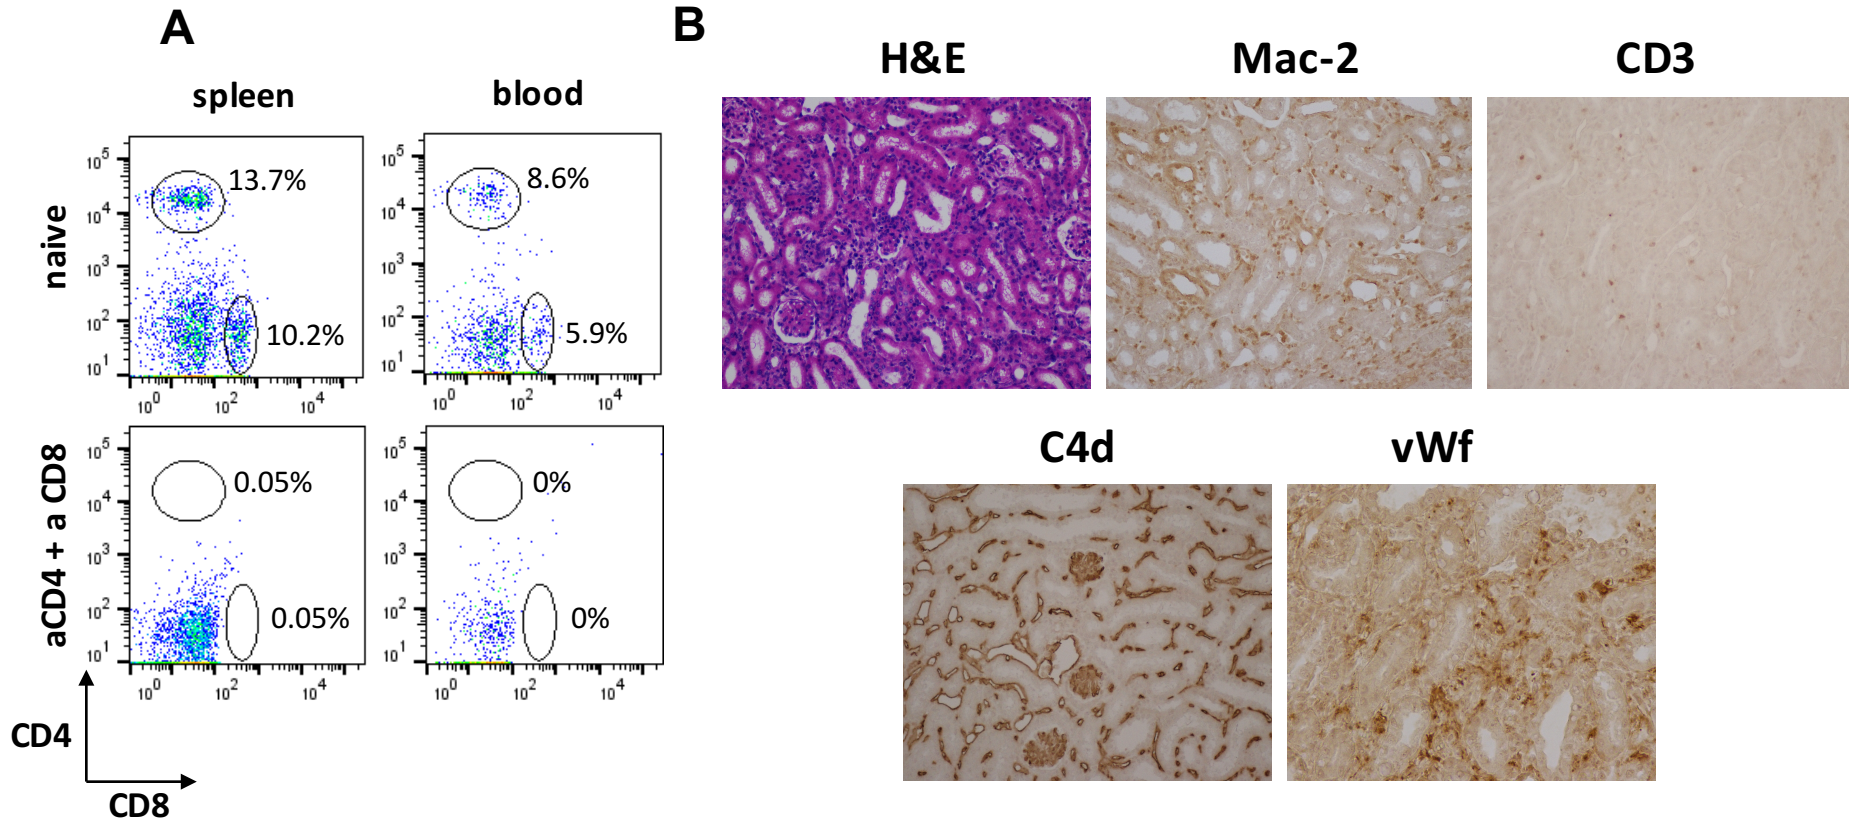

**Supplementary Figure 2. Acute allograft tissue injury in recipients containing donor-sensitized memory CD4 T cells and treated with anti-CD4 and anti-CD8 depleting mAb. A.** Spleen cells were isolated at the time of graft rejection and the efficacy of T cell depletion was assessed by flow cytometry compared to naïve non-depleted B6 mice. The dot plots are representative of 5 recipients per group. **B.** Renal allografts were harvested at the time of rejection and analyzed by H&E staining and immunoperoxidase stains for Mac-2, CD3, C4d and von Willebrand factor (vWf). Original magnification 400x for vWf staining and 200x for all other stainings.

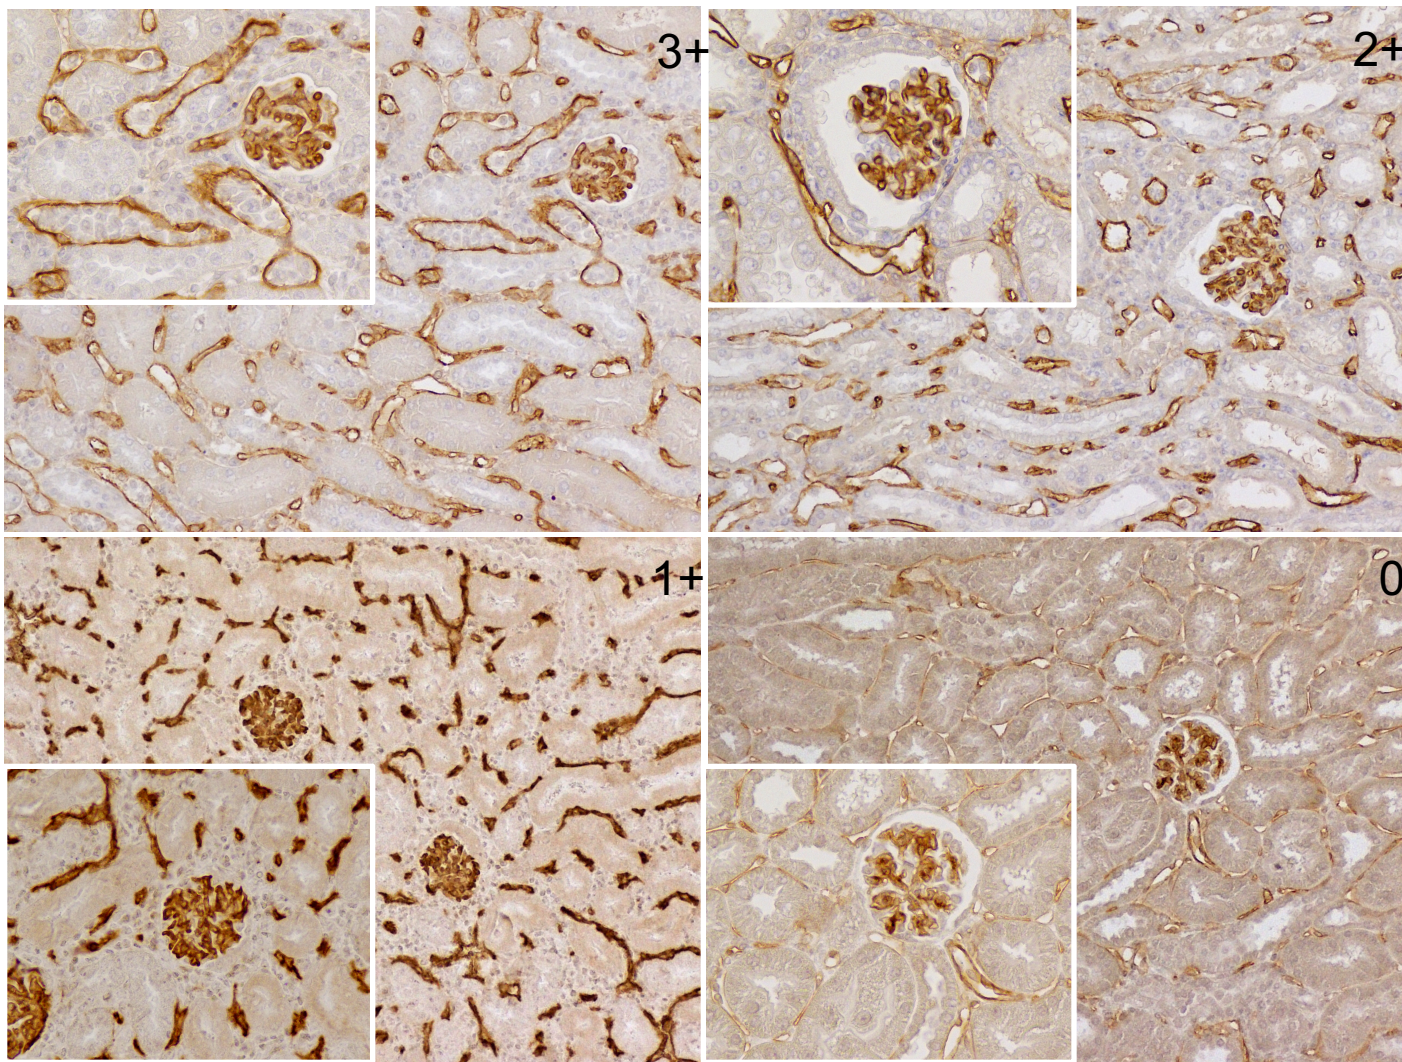

**Supplementary Figure 3. Examples of scoring for peritubular capillary changes associated with C4d staining.** Dilatation of the majority of peritubular capillaries (3+). Monocyte margination is evident in inset. Dilatation of 25-50% of the peritubular capillaries (2+). Endothelial cell swelling evident in inset. Diffuse strong C4d staining with limited dilatation of peritubular capillaries (1+). Perivascular infiltrates evident in inset. Insignificant C4d staining with little or no capillary changes (0). Original magnification of main images 200x; insets 400x.

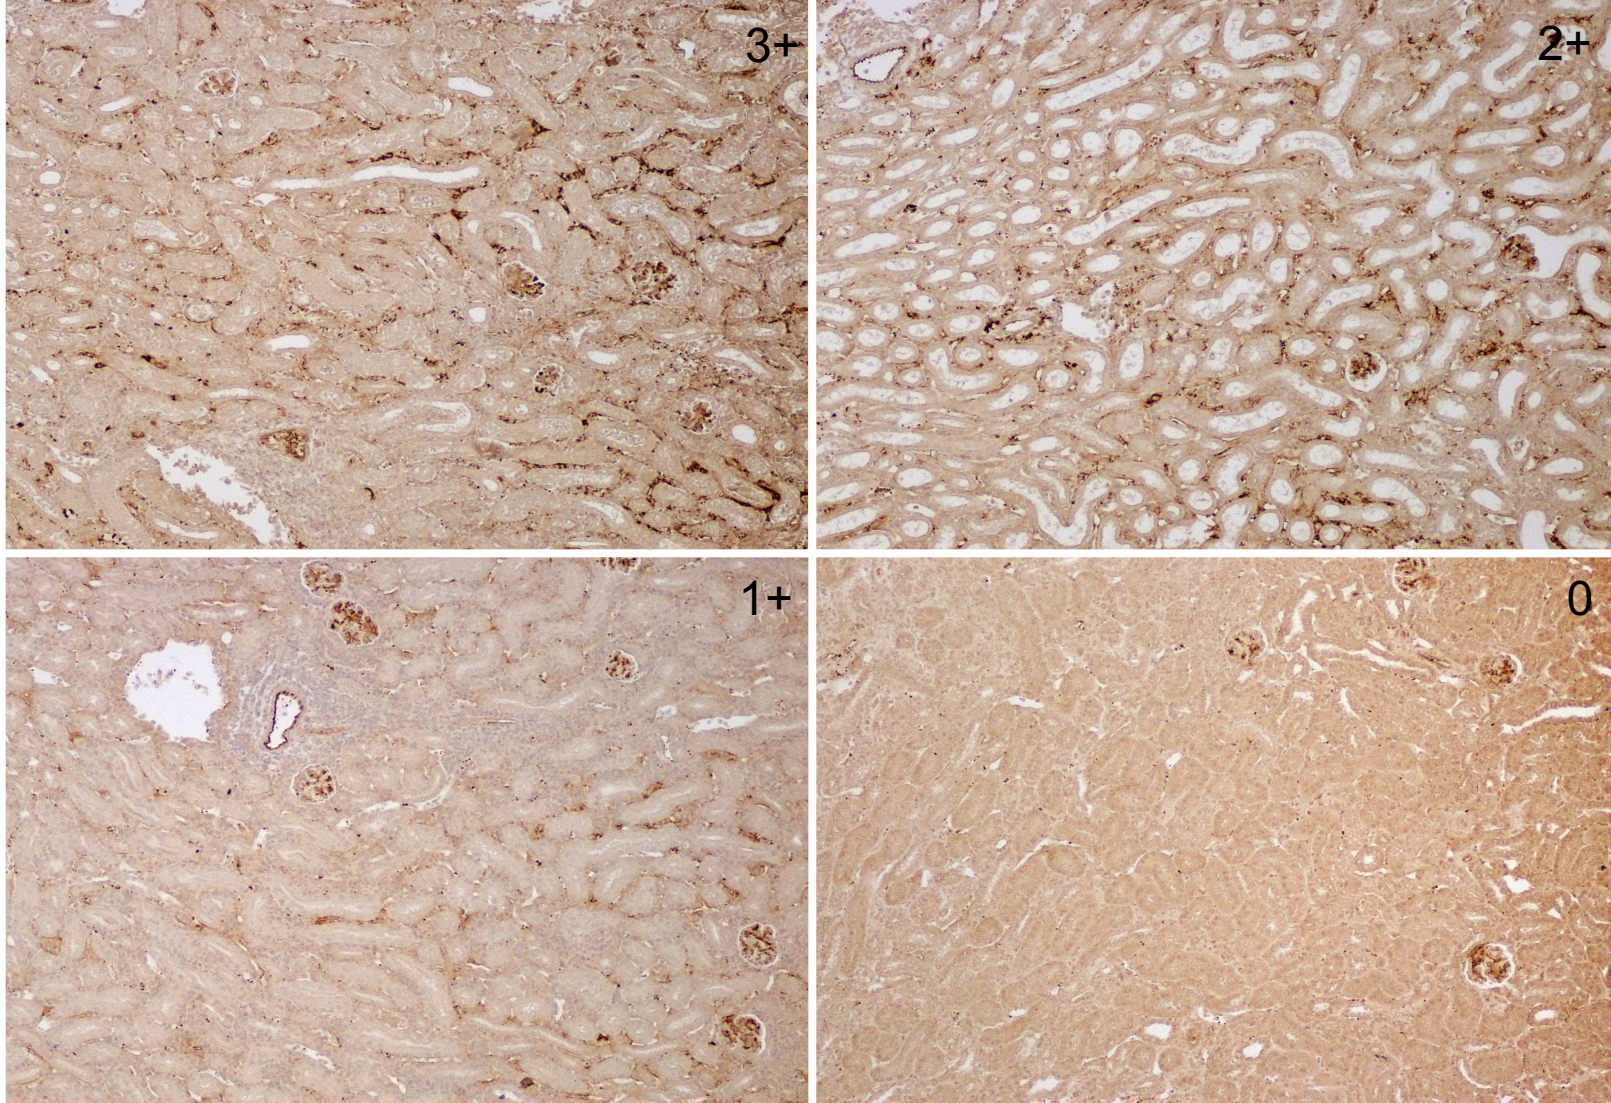

**Supplementary Figure 4. Examples of scoring for von Willebrand staining.** Diffusely confluent platelet aggregates in the cortical peritubular capillaries (3+). Focal large and small platelet aggregates in peritubular capillaries (2+). Focal small platelet aggregates in peritubular capillaries (1+). No appreciable aggregates (0+).
